# Supplementary material
Source: publisher site journal article supplement (https://www.spandidos-publications.com/5272/downloadSupplementary)

Figure S1. Variable importance plot of each cytokine or chemokine in the discrimination of BM from C as determined by the Random Forest algorithm. BM, bacterial meningitis; C, control; IL, interleukin; TNF- $\alpha$ , tumor necrosis factor- $\alpha$ ; ENA-78, epithelial-neutrophil activating peptide-78; MCP-1, monocyte chemoattractant protein-1; MIP-1 $\alpha$ , macrophage inflammatory protein-1 $\alpha$ .

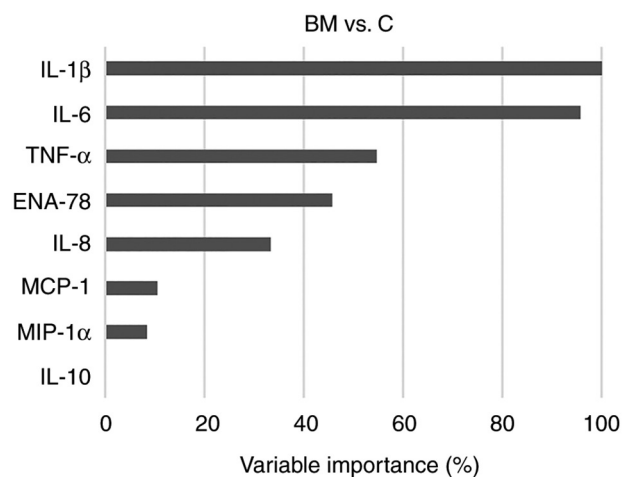

Figure S2. Variable importance plot of each cytokine or chemokine in the discrimination of VM from C determined by the Random Forest algorithm. VM, viral meningitis; C, control; IL, interleukin; ENA-78, epithelial-neutrophil activating peptide-78; MIP-1 $\alpha$ , macrophage inflammatory protein-1 $\alpha$ ; TNF- $\alpha$ , tumor necrosis factor- $\alpha$ ; MCP-1, monocyte chemoattractant protein-1.

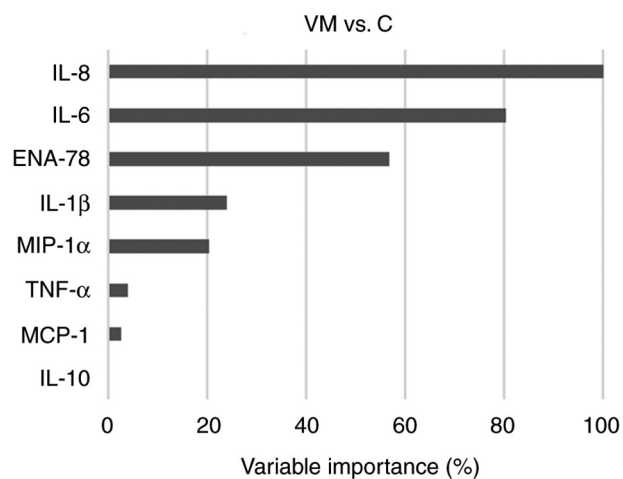

Supplement: Supplementary file 1 [file downloadSupplementary]
